# Supplementary material for: Shapes and Patterns of Heme-Binding Motifs in Mammalian Heme-Binding Proteins
Source: MDPI journal article supplement (doi:10.3390/biom13071031), 2023-06-23
Supplement: s1 [file s1]

## Supplementary Material

# Shapes and Patterns of Heme-Binding Motifs in Mammalian Heme-Binding Proteins

Dhruv C. Rathod <sup>1</sup>, Sonali M. Vaidya <sup>1</sup>, Marie-T. Hopp <sup>2</sup>, Toni Kühl <sup>1</sup> and Diana Imhof <sup>1,\*</sup>

**Table S1.** List of mammalian transient heme-binding proteins

| No. | Protein                                                                    | Origin              | Published heme-binding sites                        | PDB                        | Structural observation<br>(location of motif)                                        | pLDDT<br>score                 | References |
|-----|----------------------------------------------------------------------------|---------------------|-----------------------------------------------------|----------------------------|--------------------------------------------------------------------------------------|--------------------------------|------------|
| 1   | $\delta$ -Aminolevulinic acid synthase 1 (ALAS1)                           | <i>H. sapiens</i> * | Cys8, Cys33, Cys108 (CP-motifs)                     | P13196**                   | All CP motifs in the loop region joining two helices                                 | 1: 70-90<br>2: 50-90<br>3: <50 | [36–38]    |
| 2   | $\delta$ -Aminolevulinic acid synthase 2 (ALAS2)                           | <i>H. sapiens</i> * | Cys11, Cys38 (CP-motifs)                            | P22557**                   | All CP motifs in the loop region joining two helices                                 | -1: 60-90<br>2: 50-70          | [36,39]    |
| 3   | Amyloid $\beta$                                                            | <i>H. sapiens</i> * | Tyr10, His13/His14                                  | 1AMB                       | All motifs in centre of $\alpha$ -helices                                            | -                              | [40–44]    |
| 4   | Arginyl-Transferase (ATE1)                                                 | <i>M. musculus</i>  | Cys411 (CP-motif)                                   | O95260**                   | In the loop region joining helices and $\beta$ -sheets                               | 80-100                         | [45]       |
| 5   | Arginyl-tRNA-Synthetase (ArgRS)                                            | <i>H. sapiens</i>   | Cys115                                              | 4Q2T/1F7U                  | In the $\beta$ -sheet just before $\alpha$ -helix starts                             | -                              | [46]       |
| 6   | Bach1                                                                      | <i>M. musculus</i>  | Cys438, Cys464, Cys495, Cys649 (CP-motifs)          | O14867**                   | 1-3 : In the loop, 4: In loop region joining two helices                             | 1-3: < 50,<br>4: 90-70         | [47–50]    |
| 7   | Bach2                                                                      | <i>H. sapiens</i>   | Cys369, Cys499, Cys506 (CP-motifs)                  | A0A7L0PRE8**               | All in loop region                                                                   | <50                            | [51–53]    |
| 8   | Big Potassium (BK) channel                                                 | <i>H. sapiens</i>   | Cys612/Cys615/His616 (CXXCH-motif)                  | 6ND0                       | In the loop joining two helices                                                      | -                              | [17,54–57] |
| 9   | Complement component 1q (C1q)                                              | <i>H. sapiens</i>   | not specified                                       | -                          | -                                                                                    | -                              | [58–60]    |
| 10  | Complement component 3 (C3)                                                | <i>H. sapiens</i>   | not specified                                       | -                          | -                                                                                    | -                              | [59,60]    |
| 11  | Circadian locomotor output cycles protein kaput (CLOCK)                    | <i>M. musculus</i>  | His144, Cys195                                      | 6QPJ                       | 1: In the loop region, 2: part of $\beta$ -sheet                                     | -                              | [61]       |
| 12  | Cystathionine- $\beta$ -synthase (CBS)                                     | <i>H. sapiens</i>   | Cys15 (CP-motif), Cys52, His65                      | 1JBQ                       | HBM's not modelled                                                                   | -                              | [62–65]    |
| 13  | DiGeorge critical region 8 (DGCR8)                                         | <i>H. sapiens</i>   | Cys352                                              | 6LXD<br>(Seq not modelled) | HBM's not modelled                                                                   | -                              | [35,66]    |
| 14  | Dipeptidyl peptidase 8 (DPP8)                                              | <i>H. sapiens</i>   | Cys506 (CP-motif)                                   | -                          | In the loop between two $\beta$ -sheets                                              | -                              | [6]        |
| 15  | Eukaryotic translation initiation factor 2a kinase 1 (eIF2 $\alpha$ , HRI) | <i>M. musculus</i>  | Cys150 (CP-motif), Cys309                           | 8DYS                       | 1: In the loop region joining helices and $\beta$ -sheets, 2: part of $\beta$ -sheet | -                              | [32–34]    |
| 16  | Anti-hemophilic factor (Factor VIII)                                       | <i>H. sapiens</i>   | not specified                                       | -                          |                                                                                      | -                              | [68,69]    |
| 17  | Fibrinogen (Factor I)                                                      | <i>H. sapiens</i>   | Tyr403 (suggested)                                  | 3H32                       | HBM's not modelled                                                                   | -                              | [70,71]    |
| 18  | Glyceraldehyde-3-phosphate dehydrogenase (GAPDH)                           | <i>H. sapiens</i>   | not specified                                       | -                          | -                                                                                    | -                              | [72–76]    |
| 19  | Heme oxygenase 2 (HO2)                                                     | <i>H. sapiens</i> * | His45, His256, Cys265 (CP-motif), Cys282 (CP-motif) | 2Q32(H-motifs)             | 1: part of the helix, other motifs not modelled                                      | -                              | [77–80]    |
| 20  | Human period circadian protein homolog 2 (hPer2)                           | <i>H. sapiens</i>   | Cys841, Cys962 (CP-motifs)                          | O15055**                   | All in loop regions                                                                  | <50                            | [81]       |

|    |                                               |                      |                                              |          |                                                                                                                              |      |          |
|----|-----------------------------------------------|----------------------|----------------------------------------------|----------|------------------------------------------------------------------------------------------------------------------------------|------|----------|
| 21 | Immunoglobulin (IgG)                          | <i>H. sapiens</i>    | not specified                                | -        | -                                                                                                                            | -    | [82]     |
| 22 | Insulin                                       | <i>H. sapiens</i>    | His5, Tyr26 (suggested)                      | 1UZ9     | HBM's not modelled                                                                                                           | -    | [83]     |
| 23 | Interleukin-36 (IL36) $\alpha, \beta, \gamma$ | <i>H. sapiens</i>    | Cys136 (CP-motif), Tyr108(YH-motif)          | 6HPI     | In the loop between two $\beta$ -sheets                                                                                      | -    | [20]     |
| 24 | Iron regulatory protein 1 (IRP1)              | <i>H. sapiens</i>    | Cys118, Cys300 (CP-motifs)                   | Q9HBB2** | 1 : In loop region joining $\alpha$ -helix and $\beta$ -sheets<br>2 : Last residue of the $\alpha$ -helix before loop starts | > 90 | [29–31]  |
| 25 | Iron regulatory protein 2 (IRP2)              | <i>H. sapiens</i>    | Cys201 (CP-motif), His204, Cys375 (CP-motif) | 6VCD     | In loop between two helices (CP motifs)<br>(motif1 and 2 not modelled)                                                       | -    | [29–31]  |
| 26 | Janus kinase 2 (JAK2)                         | <i>H. sapiens</i>    | His974, Cys1092 (CP-motif)                   | 7UYW     | In loop between two helices (CP motifs)                                                                                      | -    | [85]     |
| 27 | K <sub>ATP</sub> channels                     | <i>R. norvegicus</i> | Cys629/His631/Tyr648/His649                  | 7MJQ     | HBM's not modelled                                                                                                           | -    | [86]     |
| 28 | Neudesin                                      | <i>M. musculus</i>   | not specified                                | -        | -                                                                                                                            | -    | [87]     |
| 29 | Neuferricin                                   | <i>M. musculus</i>   | not specified                                | -        | -                                                                                                                            | -    | [88]     |
| 30 | Neuronal PAS domain protein 2 (NPAS2)         | <i>H. sapiens</i>    | His119, Cys170/His171, His335 (suggested)    | Q99743** | In loop joining two helices,<br>2-3: In the middle of $\beta$ -sheets<br>4: In the loop just after $\beta$ -sheet ends       | >90  | [89]     |
| 31 | NMDA Receptor                                 | <i>M. musculus</i>   | not specified                                | -        | -                                                                                                                            | -    | [90,91]  |
| 32 | p53                                           | <i>H. sapiens</i>    | Cys275, Cys277 (CP-motif)                    | 7XZZ     | HBM's not modelled                                                                                                           | -    | [92,93]  |
| 33 | p63                                           | <i>H. sapiens</i>    | CP-motif                                     | 3US2     | -                                                                                                                            | -    | [92]     |
| 34 | p73                                           | <i>H. sapiens</i>    | CP-motif                                     | -        | -                                                                                                                            | -    | [92]     |
| 35 | PGRMC1/Sigma-2 receptor                       | <i>H. sapiens</i>    | Tyr113                                       | 4X8Y     | Part of $\beta$ -sheet in loop region                                                                                        | -    | [94,95]  |
| 36 | Rev-erba                                      | <i>H. sapiens</i>    | His602                                       | -        | -                                                                                                                            | -    | [96,97]  |
| 37 | Rev-erb $\beta$                               | <i>H. sapiens</i>    | Cys384, His568                               | 3CQV     | Cys in the helix and His in the loop                                                                                         | -    | [97–102] |
| 38 | SOUL                                          | <i>H. sapiens</i>    | Not specified                                | -        | -                                                                                                                            | -    | [103]    |
| 39 | Proto-oncogene tyrosine-protein kinase (Src)  | <i>H. sapiens</i>    | Cys486                                       | 2BDJ     | CP motif in loop region at the interface of two helices (possible disulphide bond formation between Cys486 and Cys490)       | -    | [85]     |
| 40 | Stanniocalcin-1 (STC 1)                       | <i>H. sapiens</i>    | Cys114                                       | P52823** | Last residue of the $\alpha$ -helix before loop starts                                                                       | >90  | [15]     |

|    |                                                    |                     |                                             |      |                                                                                                                                                                                                                         |   |           |
|----|----------------------------------------------------|---------------------|---------------------------------------------|------|-------------------------------------------------------------------------------------------------------------------------------------------------------------------------------------------------------------------------|---|-----------|
| 41 | Stanniocalcin-2 (STC 2)                            | <i>H. sapiens</i>   | Cys125                                      | 8A7E | CP motif in loop region at the interface of two helices                                                                                                                                                                 | - | [104]     |
| 42 | Toll-like Receptor 4 (TLR4)                        | <i>H. sapiens</i>   | His125, Cys169, His433, Tyr517, Cys 519     | 3FXI | Cys169 in $\alpha$ -helix and turn region (extra-cellular domain)<br>HXH Motifs at the interface of two monomers (which forms a pocket-like region)<br>HBM with Cys519 forms hydrophobic interaction with lipid bilayer | - | [105]     |
| 43 | Tryptophanyl-tRNA-Synthetase                       | <i>H. sapiens</i>   | His130 (His129, His336, His445 assumed)     | 5EKD | 1: part of the helix                                                                                                                                                                                                    | - | [106]     |
| 44 | Angiotensin-converting enzyme 2 (ACE2)             | <i>H. sapiens</i>   | His239, Tyr515                              | 6M17 | 1,2: part of helix                                                                                                                                                                                                      | - | [107]     |
| 45 | Activated protein C (APC)                          | <i>H. sapiens</i>   | His391 (HXH-motif), Tyr289 (YH-motif)       | 1AUT | Motif with His154 within light chain; motif with His356 located within heavy chain<br>HBM forms $\beta$ -turn close to APC active site                                                                                  | - | [22]      |
| 46 | Cluster of Differentiation 74 (CD74)               | <i>H. sapiens</i>   | not specified                               | -    | -                                                                                                                                                                                                                       | - | [108]     |
| 47 | Cortactin                                          | <i>H. sapiens</i>   | not specified                               | -    | -                                                                                                                                                                                                                       | - | [4]       |
| 48 | C-type lectin-like receptor 2 (CLEC2)              | <i>H. sapiens</i> * | not specified                               | -    | -                                                                                                                                                                                                                       | - | [109,110] |
| 49 | Glycoprotein VI                                    | <i>H. sapiens</i>   | not specified                               | -    | -                                                                                                                                                                                                                       | - | [110]     |
| 50 | Hemoglobin (Hb)                                    | <i>H. sapiens</i>   | Cys112/His116 (CXXXH-motif), His 143/His146 | 1A3N | (HBMs in $\beta$ -chains)                                                                                                                                                                                               | - | [23]      |
| 51 | Hemopexin (Hx)                                     | <i>H. sapiens</i>   | His236 (HXH-motif), His260/His293           | 1QJS | 1-3: part of loop region                                                                                                                                                                                                | - | [111]     |
| 52 | Interleukin-1 receptor-associated kinase 1 (IRAK1) | <i>H. sapiens</i>   | not specified                               | -    | -                                                                                                                                                                                                                       | - | [112]     |
| 53 | Kv10.1 channel (hEAG1)                             | <i>H. sapiens</i>   | Cys541/His543/His552                        | -    | -                                                                                                                                                                                                                       | - | [113]     |
| 54 | Myeloid differentiation factor 2 (MD2)             | <i>H. sapiens</i>   | His44, Tyr61                                | -    | HBMs located independently to LPS-binding site                                                                                                                                                                          | - | [114]     |
| 55 | Sodium channel protein type 5 (Nav1.5) channels    | <i>H. sapiens</i>   | not specified                               | -    | -                                                                                                                                                                                                                       | - | [115]     |
| 56 | Receptor for advanced glycation endproducts (RAGE) | <i>H. sapiens</i>   | not specified                               | -    | -                                                                                                                                                                                                                       | - | [116]     |
| 57 | Tumor necrosis factor (TNF $\alpha$ )              | <i>H. sapiens</i>   | not specified                               | -    | -                                                                                                                                                                                                                       | - | [108]     |

\* In the case of these proteins, there is also further information in the literature on HBMs in other species that is not listed here. \*\* Structure selected from AlphaFold.

**Table S2.** Analytical characterization of peptides **11-17**.

| No. | Peptide sequence | M <sub>w</sub> /(M <sub>w</sub> calc.)[g/mol] <sup>a</sup> | t <sub>r</sub> <sup>*</sup> [min] | t <sub>r</sub> <sup>**</sup> [min] <sup>*</sup> | R <sub>f</sub>                      |
|-----|------------------|------------------------------------------------------------|-----------------------------------|-------------------------------------------------|-------------------------------------|
| 11  | TPILCPHFLQPV     | 682.34 (1361.74) <sup>a</sup>                              | 80.8 <sup>c</sup>                 | 15.7 <sup>e</sup>                               | 0.57 <sup>g</sup> 0.71 <sup>h</sup> |
| 12  | TPILCPFHLQPV     | 682.39 (1361.74) <sup>a</sup>                              | 80.8 <sup>c</sup>                 | 17.3 <sup>e</sup>                               | 0.66 <sup>g</sup> 0.73 <sup>h</sup> |
| 13  | TPILCPFLHQPV     | 682.38 (1361.74) <sup>a</sup>                              | 75.1 <sup>c</sup>                 | 17.4 <sup>e</sup>                               | 0.57 <sup>g</sup> 0.71 <sup>h</sup> |
| 14  | TPILCPFLQHPV     | 682.39 (1361.74) <sup>a</sup>                              | 77.2 <sup>c</sup>                 | 17.3 <sup>e</sup>                               | 0.66 <sup>g</sup> 0.73 <sup>h</sup> |
| 15  | TPILCPFLQPHV     | 682.39 (1361.74) <sup>a</sup>                              | 77.5 <sup>c</sup>                 | 18.7 <sup>e</sup>                               | 0.66 <sup>g</sup> 0.88 <sup>h</sup> |
| 16  | SEGGPCLIL        | 887.47 (886.45) <sup>b</sup>                               | 44.7 <sup>d</sup>                 | 18.5 <sup>f</sup>                               | 0.51 <sup>g</sup> 0.69 <sup>h</sup> |
| 17  | LILPCGGES        | 887.47 (886.45) <sup>b</sup>                               | 60.2 <sup>d</sup>                 | 24.2 <sup>f</sup>                               | 0.61 <sup>g</sup> 0.85 <sup>h</sup> |

Peptides were measured with LC-ESI-MS and peaks were detected as a) [M+2H]<sup>2+</sup> and b) [M+H]<sup>+</sup>. <sup>\*</sup>Semipreparative RP-HPLC was applied for peptide purification using c) 0 – 50% eluent B (0.1% TFA in 90% acetonitrile, eluent A: 0.1% TFA in water) in 120 min and d) 10 – 60% eluent B in 120 min as gradients. <sup>\*\*</sup>Analytical HPLC was performed using e) 20 – 60% eluent B (0.1% TFA in acetonitrile, eluent A: 0.1% TFA in water) in 40 min and f) 10 – 40% eluent B in 30 min. For TLC the following systems were applied: g) n-butanol/acetic acid/water (48:18:24, v/v) and h) pyridine/ethyl acetate/acetic acid/water (5:5:1:3, v/v).

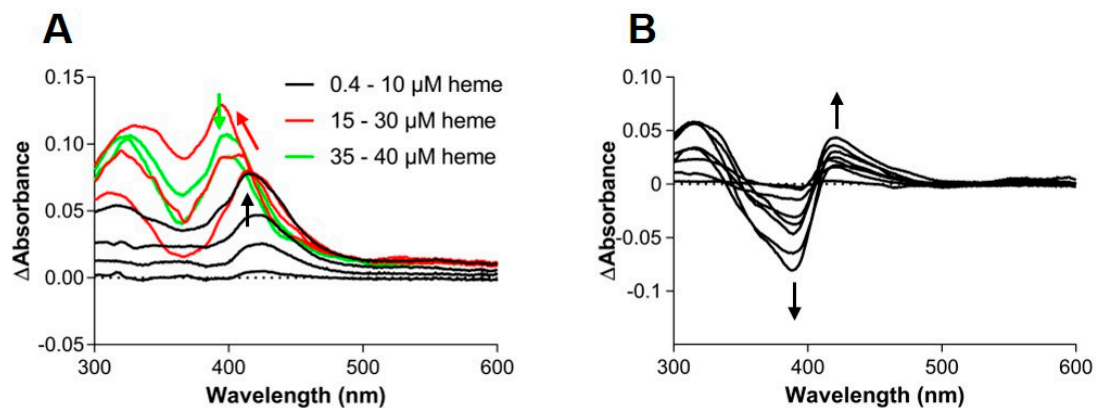

**Figure S1.** UV/Vis differential spectra of heme incubated with peptide **16** (A) and peptide **17** (B). Peptide **16**, the inverse sequence of **7** (resulting in a PC-motif), shows no steady spectra upon heme application but a concentration-dependent shift of the maximum from ~416 nm to ~398 nm. In contrast to the wild-type peptide **7** that depicted a shift to ~370 nm the UV/Vis data suggests a different binding mode for **16**. The spectrum of peptide **17** (PC-motif in the forward peptide sequence of **7**) deviates also from the wild-type spectrum of peptide **7**. However, a concentration-dependent trend with a maximum at ~416 nm was observed. Due to the low change of absorbance upon heme binding, KD determination was not possible.
